# Supplementary material for: Performance of a Machine Learning Algorithm to Predict Hypotension in Spontaneously Breathing Non-Ventilated Post-Anesthesia and ICU Patients
Source: MDPI journal article supplement (doi:10.3390/jpm14020210), 2024-02-15
Supplement: s1 [file s1]

Table S1. Matrix showing True Positives, True Negatives, False Positives and False Negatives for all studies HPI thresholds.

| HPI<br>above<br>threshold<br>$\geq 1$<br>minute | True<br>positives | False<br>positives | False<br>Negatives | True<br>negatives |
|-------------------------------------------------|-------------------|--------------------|--------------------|-------------------|
| 0                                               | 4892              | 1995               | 0                  | 6                 |
| 5                                               | 4893              | 1966               | 0                  | 222               |
| 10                                              | 4890              | 1938               | 0                  | 350               |
| 15                                              | 4894              | 1892               | 0                  | 521               |
| 20                                              | 4900              | 1821               | 0                  | 702               |
| 25                                              | 4896              | 1758               | 0                  | 900               |
| 30                                              | 4887              | 1658               | 0                  | 1138              |
| 35                                              | 4903              | 1558               | 0                  | 1397              |
| 40                                              | 4910              | 1462               | 0                  | 1645              |
| 45                                              | 4922              | 1382               | 0                  | 1816              |
| 50                                              | 4928              | 1305               | 0                  | 1967              |
| 55                                              | 4944              | 1261               | 0                  | 2099              |
| 60                                              | 4933              | 1175               | 0                  | 2259              |
| 65                                              | 4908              | 1114               | 0                  | 2415              |
| 70                                              | 4887              | 1043               | 0                  | 2564              |
| 75                                              | 4874              | 963                | 0                  | 2701              |
| 80                                              | 4820              | 903                | 2                  | 2850              |
| 85                                              | 4787              | 823                | 5                  | 3001              |
| 90                                              | 4653              | 714                | 14                 | 3193              |
| 95                                              | 4091              | 470                | 39                 | 3624              |
| 100                                             | 0                 | 0                  | 2530               | 4203              |
